# Supplementary material for: A nine-gene signature related to tumor microenvironment predicts overall survival with ovarian cancer
Source: publisher site journal article supplement (doi:10.18632/aging.102914), 2020-03-24
Supplement: Supplementary file [file aging-v12i6-102914-supplementary-material-SD1.pdf]

**SUPPLEMENTARY FIGURE**

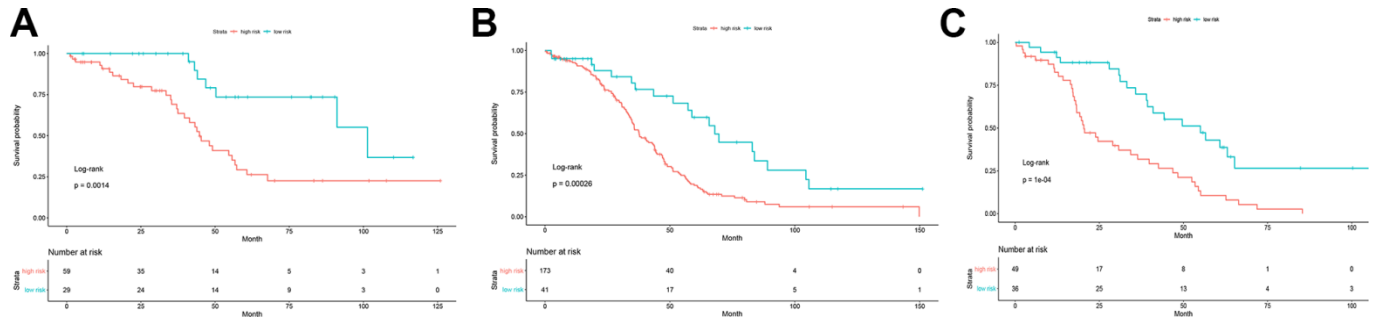

**Supplementary Figure 1. Kaplan-Meier curves of OS in the subgroups stratified by tumor residual disease. (A) No Macroscopic disease (B) Tumor residual size is 1-10 mm (C) tumor residual size >20 mm.**
